# Supplementary material for: Caspase-mediated nuclear pore complex trimming in cell differentiation and endoplasmic reticulum stress
Source: eLife journal article supplement (doi:10.7554/elife.89066), 2023-08-08

# Ponceau S staining – Related to Figures 1, 2, 3, and 5

Staining levels were determined by densitometric analysis. Normalized against lanes marked with arrowheads.

## Figure 1A

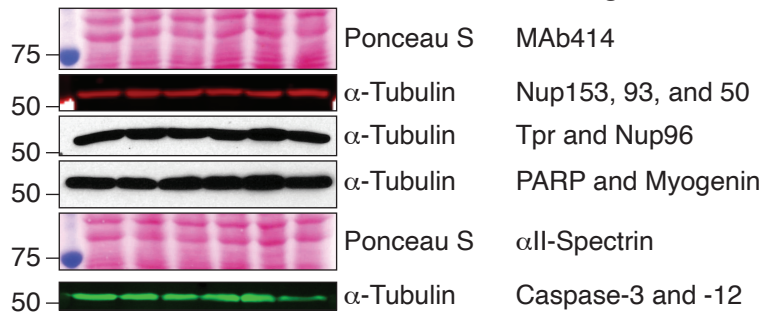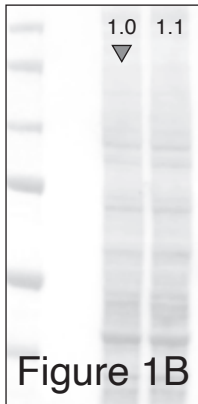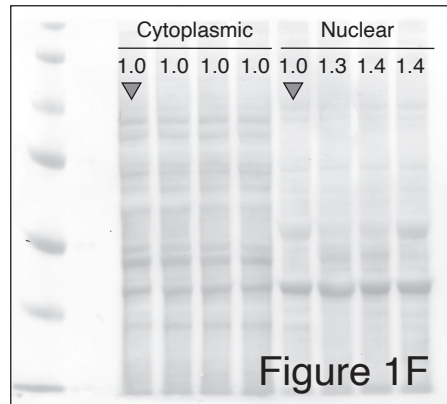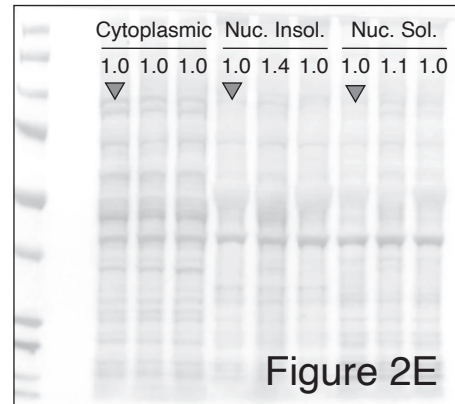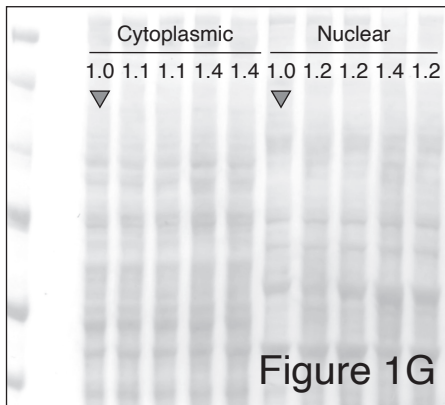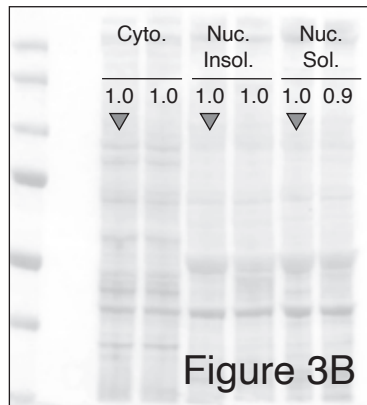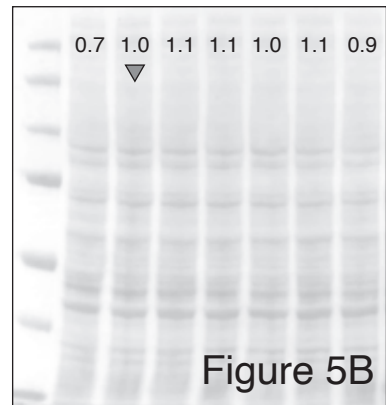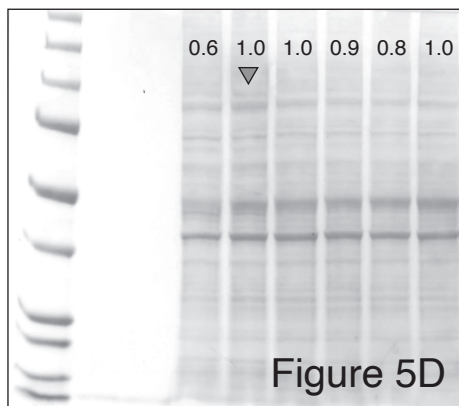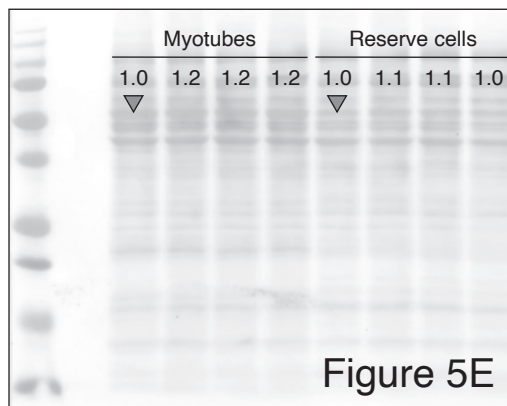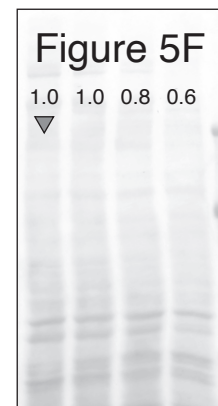

# Ponceau S staining – Related to Supplementary Figures

Staining levels were determined by densitometric analysis. Normalized against lanes marked with arrowheads.

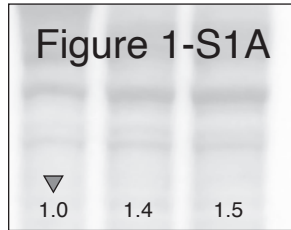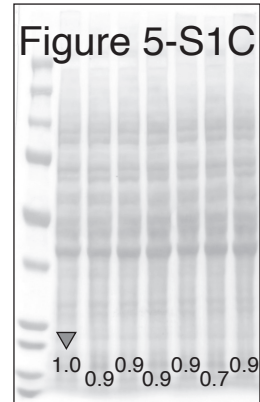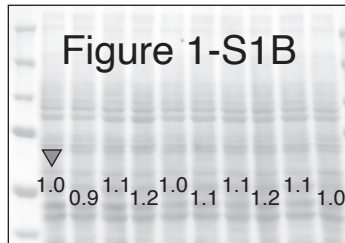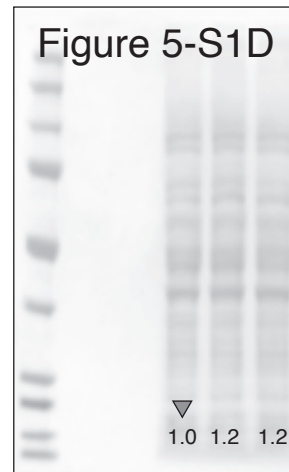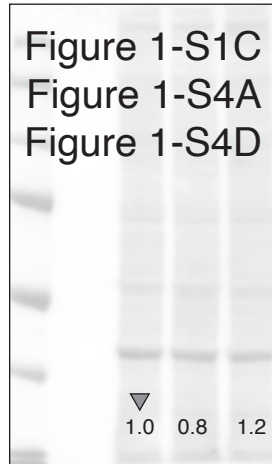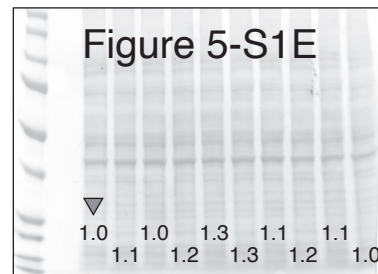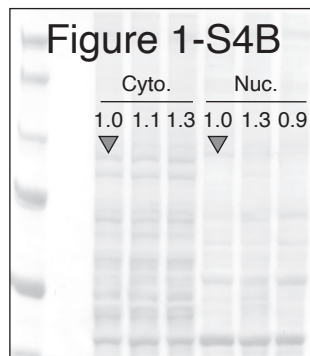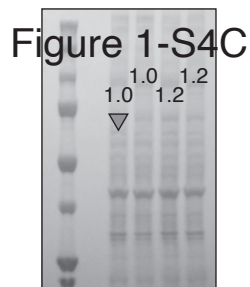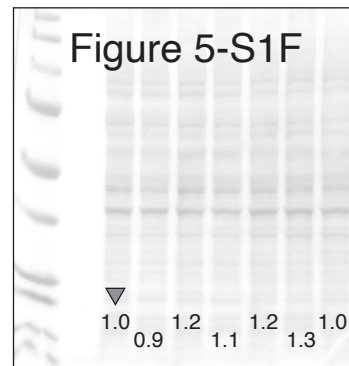

Supplement: data1 [file elife-89066-data1-v1.pdf]
